# Supplementary material
Source: PubMed Central journal article supplement (PMC7366328)
Supplement: JRS918236_Supplemental_Material.pdf [file JRS918236_Supplemental_Material.pdf]

Appendix 1: Table to show papers included in qualitative synthesis of literature examining associations between loneliness, social isolation, cardiovascular disease and mortality

| <b>Paper</b>                                                                                                                                                           | <b>Author</b>            | <b>Publication date</b> |
|------------------------------------------------------------------------------------------------------------------------------------------------------------------------|--------------------------|-------------------------|
| Loneliness and social isolation as risk factors for mortality: a meta-analytic review                                                                                  | Stephenson et al         | 2015                    |
| Social isolation, loneliness, and all-cause mortality in older men and women                                                                                           | Wardle et al             | 2013                    |
| A Prospective Study of Social Isolation, Loneliness, and Mortality in Finland                                                                                          | Anttila and Tanskanen    | 2016                    |
| Loneliness and mortality among older adults in China                                                                                                                   | Waite and Luo            | 2014                    |
| Loneliness, social isolation, their synergistic interaction, and mortality                                                                                             | Wagner and Beller        | 2018                    |
| Reported loneliness rather than social isolation is a risk factor for 10-year mortality in older men                                                                   | Andrew                   | 2012                    |
| Social isolation: a predictor of mortality comparable to traditional clinical risk factors                                                                             | Adler et al              | 2013                    |
| Loneliness, health, and mortality in old age: a national longitudinal study                                                                                            | Cacioppo et al           | 2012                    |
| Does the mortality risk of social isolation depend upon socioeconomic factors?                                                                                         | Patterson                | 2016                    |
| Loneliness, health and mortality                                                                                                                                       | Andersson et al          | 2019                    |
| Loneliness, social networks, and mortality: 18 years of follow-up                                                                                                      | Stessman et al           | 2011                    |
| Situational versus chronic loneliness as risk factors for all-cause mortality.                                                                                         | Shiovitz-Ezra and Avalon | 2010                    |
| Social isolation and adult mortality: the role of chronic inflammation and sex differences                                                                             | Li et al                 | 2013                    |
| Among elderly men, feelings of loneliness are associated with increased 10-year mortality risk, independent of social isolation and medical and psychiatric conditions | Obisesan                 | 2013                    |
| Older people who report loneliness have increased risk of mortality and functional decline                                                                             | Theeke                   | 2013                    |
| Loneliness and risk of mortality: a longitudinal investigation in Alameda County, California                                                                           | Patterson and Veenstra   | 2010                    |
| Consequences of loneliness on physical activity and mortality in older adults and the power of positive emotions                                                       | Stewart et al            | 2013                    |
| Effect of loneliness on mortality after retirement.                                                                                                                    | Niemi                    | 1979                    |
| Social isolation, C-reactive protein, and coronary heart disease mortality among community-dwelling adults                                                             | Gramling et al           | 2013                    |
| Increased risk of mortality associated with social isolation in older men: only when feeling lonely? Results from the Amsterdam Study of the Elderly (AMSTEL)          | Schoevers et al          | 2012                    |
| Suffering from loneliness indicates significant mortality risk of older people                                                                                         | Pitkälä KH. Et al        | 2011                    |
| Social isolation and loneliness as risk factors for myocardial infarction, stroke and mortality: UK Biobank cohort study of 479 054 men and women                      | Elovainio et al          | 2018                    |
| Emotional loneliness is associated with mortality among mentally intact nursing home residents with and without cancer: a five-year follow-up study.                   | Ranhoff et al            | 2013                    |
| Feelings of Loneliness and Living Alone as Predictors of Mortality in the Elderly: The PAQUID Study.                                                                   | Dartigues et al          | 2016                    |
| Impact of loneliness and depression on mortality: results from the Longitudinal Ageing Study Amsterdam                                                                 | Schoevers et al          | 2016                    |
| Relationship of depression, anxiety, and social isolation to chronic heart                                                                                             | Gottlieb et al           | 2006                    |

|                                                                                                                                                                                                  |                          |      |
|--------------------------------------------------------------------------------------------------------------------------------------------------------------------------------------------------|--------------------------|------|
| failure outpatient mortality                                                                                                                                                                     |                          |      |
| Extreme social isolation, use of community-based senior support services, and mortality among African American elderly women.                                                                    | Nickerson et al          | 1997 |
| Loneliness and All-Cause, Cardiovascular, and Noncardiovascular Mortality in Older Men: The Zutphen Elderly Study                                                                                | Giltay et al             | 2016 |
| The feeling of loneliness prior to coronary artery bypass grafting might be a predictor of short-and long-term postoperative mortality                                                           | Karlsson et al           | 1998 |
| Combined effects of job strain and social isolation on cardiovascular disease morbidity and mortality in a random sample of the Swedish male working population                                  | Theorell et al           | 1989 |
| Social isolation and mortality in ischemic heart disease. A 10-year follow-up study of 150 middle-aged men                                                                                       | Edwards et al            | 1988 |
| Effects of psychosocial group rehabilitation on health, use of health care services, and mortality of older persons suffering from loneliness: a randomized, controlled trial                    | Tilvis et al             | 2009 |
| All-cause mortality and multimorbidity in older adults: The role of social support and loneliness                                                                                                | Haro et al               | 2017 |
| Social isolation, health literacy, and mortality risk: Findings from the English Longitudinal Study of Ageing                                                                                    | Steptoe et al            | 2018 |
| Social isolation and all-cause mortality: a population-based cohort study in Denmark                                                                                                             | Ehrenstein et al         | 2018 |
| Heartbeat: Social isolation is associated with increased mortality after acute myocardial infarction or stroke                                                                                   | Otto                     | 2018 |
| Association of loneliness with all-cause mortality: A meta-analysis.                                                                                                                             | Miret et al              | 2018 |
| The Pathophysiology of Perceived Social Isolation: Effects on Health and Mortality.                                                                                                              | Bhatti and Hag           | 2017 |
| Relationships between social isolation, neighbourhood poverty, and cancer mortality in a population-based study of US adults                                                                     | Llanos et al             | 2017 |
| Co-existence of social isolation and homebound status increase the risk of all-cause mortality                                                                                                   | Fujiwara et al           | 2019 |
| Social Isolation and Mortality in US Black and White Men and Women.                                                                                                                              | Gapstur et al            | 2019 |
| Loneliness, social isolation and risk of cardiovascular disease in the English Longitudinal Study of Ageing                                                                                      | Hanratty et al           | 2018 |
| Social isolation and cardiovascular disease: an atherosclerotic pathway?                                                                                                                         | Knox and Uvnäs-Moberg K. | 1998 |
| Loneliness and cardiovascular disease and the role of late-life depression                                                                                                                       | Van der Mast et al       | 2018 |
| Loneliness and all-cause mortality in community-dwelling elderly Singaporeans                                                                                                                    | Chan et al               | 2015 |
| Social isolation, cognitive decline, and cardiovascular disease risk                                                                                                                             | White et al              | 2015 |
| Depression, isolation, social support, and cardiovascular disease in older adults                                                                                                                | Arthur et al             | 2006 |
| Does social isolation predict hospitalization and mortality among HIV+ and uninfected older veterans?                                                                                            | Justice et al            | 2013 |
| The personal and community impact of a Scottish Men's Shed                                                                                                                                       | Leslie et al             | 2018 |
| Loneliness in older adults is associated with diminished cortisol output                                                                                                                         | Comijs et al             | 2017 |
| Sleep disturbance and longitudinal risk of inflammation: Moderating influences of social integration and social isolation in the Coronary Artery Risk Development in Young Adults (CARDIA) study | Irwin et al              | 2015 |
| Longitudinal study of suicide after traumatic injury                                                                                                                                             | Dischinger et al         | 2006 |
| Social isolation and health, with an emphasis on underlying mechanisms                                                                                                                           | Cacioppo and Hawkey      | 2003 |
| Type A behaviour, social support, and coronary risk: interaction and                                                                                                                             | Orth-Gomer and           | 1990 |

|                                                                                                                                                                                                          |                      |      |
|----------------------------------------------------------------------------------------------------------------------------------------------------------------------------------------------------------|----------------------|------|
| significance for mortality in cardiac patients                                                                                                                                                           | Uden                 |      |
| Older Adults' Social Relationships and Health Care Utilization: A Systematic Review                                                                                                                      | Hanratty et al       | 2018 |
| Frequency of Leaving the House and Mortality from Age 70 to 95                                                                                                                                           | Stessman et al       | 2018 |
| Whites but Not Blacks Gain Life Expectancy from Social Contacts                                                                                                                                          | Assari               | 2017 |
| Does current smoking predict future frailty? The English longitudinal study of ageing                                                                                                                    | Walters et al        | 2018 |
| An overview of systematic reviews on the public health consequences of social isolation and loneliness                                                                                                   | Caan et al           | 2017 |
| The association between social support and physical activity in older adults: a systematic review                                                                                                        | Van Uffelen et al    | 2017 |
| Prevalence of orthostatic hypertension in the very elderly and its relationship to all-cause mortality                                                                                                   | Stessman et al       | 2016 |
| Gender-specific secondary prevention? Differential psychosocial risk factors for major cardiovascular events                                                                                             | Stewart et al        | 2016 |
| Psychosocial interventions for patients with coronary heart disease and depression: A systematic review and meta-analysis                                                                                | Thompson et al       | 2016 |
| Gender differences in the roles for social support in ensuring adequate fruit and vegetable consumption among older adult Canadians                                                                      | Rugel and Carpiano   | 2015 |
| unobtrusive in-home detection of time spent out-of-home with applications to loneliness and physical activity                                                                                            | Austin et al         | 2014 |
| Role of social factors on cell death, cerebral plasticity and recovery after stroke                                                                                                                      | Venna and McCullough | 2015 |
| Nutritional risk and body mass index predict hospitalization, nursing home admissions, and mortality in community-dwelling older adults: results from the UAB Study of Aging with 8.5 years of follow-up | Locher et al         | 2014 |
| Using multi-level data to estimate the effect of social capital on hazardous alcohol consumption in the former Soviet Union                                                                              | McKee et al          | 2014 |
| Social networks, social support, and burden in relationships, and mortality after breast cancer diagnosis in the Life After Breast Cancer Epidemiology (LACE) study                                      | Caan et al           | 2013 |
| Socioeconomic status, structural and functional measures of social support, and mortality: The British Whitehall II Cohort Study, 1985-2009                                                              | Singh-Manoux et al   | 2012 |
| Living alone and alcohol-related mortality: a population-based cohort study from Finland                                                                                                                 | Kivimaki et al       | 2011 |
| Positive life orientation predicts good survival prognosis in old age                                                                                                                                    | Pitkala et al        | 2012 |
| Long-term effect of social relationships on mortality in patients with congestive heart failure                                                                                                          | Murberg              | 2004 |
| Is depression in old age fatal only when people feel lonely?                                                                                                                                             | Westendorp et al     | 2005 |
| Predictors of cognitive decline and mortality of aged people over a 10-year period                                                                                                                       | Strandberg et al     | 2004 |
| Towards a suicide free society: identify suicide prevention as public health policy                                                                                                                      | Singh and Singh      | 2004 |
| Eating habits and appetite control in the elderly: the anorexia of aging.                                                                                                                                | Cannella et al       | 2003 |
| Effects of depression and social integration on the relationship between alcohol consumption and all-cause mortality                                                                                     | Rogers et al         | 2002 |
| Longitudinal study of psychiatric symptoms, disability, mortality, and emigration among Bosnian refugees                                                                                                 | Massagli et al       | 2001 |
| Characteristics of socially isolated patients with coronary artery disease who are at elevated risk for mortality                                                                                        | Mark et al           | 2001 |
| Self-reported life satisfaction and 20-year mortality in healthy Finnish adults                                                                                                                          | Koskenvuo et al      | 2000 |
| Why do men get more heart disease than women? An international                                                                                                                                           | Weidner              | 2000 |

|                                                                                                                                                   |                       |      |
|---------------------------------------------------------------------------------------------------------------------------------------------------|-----------------------|------|
| perspective                                                                                                                                       |                       |      |
| Depressive symptoms and lack of social integration in relation to prognosis of CHD in middle-aged women. The Stockholm Female Coronary Risk Study | Oth-Gomer et al       | 2000 |
| Pet ownership protects against the risks and consequences of coronary heart disease                                                               | Patronek and Glickman | 1993 |
| Social Networks and Health Outcomes: Importance for Racial and Socioeconomic Disparities in Cardiovascular Outcomes                               | Child and Albert      | 2018 |
| A conceptual model of social networks and mechanisms of cancer mortality, and potential strategies to improve survival                            | Molina et al          | 2018 |
| The role of social relationships in the link between olfactory dysfunction and mortality                                                          | Leschak               | 2018 |
| Loneliness, Social Isolation, and Cardiovascular Health                                                                                           | Xia and Li            | 2018 |
| Loneliness and Health in Older Adults: A Mini-Review and Synthesis                                                                                | Ong et al             | 2016 |
| Breast cancer and social environment: getting by with a little help from our friends.                                                             | De Vries et al        | 2016 |
| One is the deadliest number: the detrimental effects of social isolation on cerebrovascular diseases and cognition.                               | McCullough et al      | 2015 |
| Personal Networks and Mortality Risk in Older Adults: A Twenty-Year Longitudinal Study                                                            | Steverink et al       | 2015 |
| The neuroendocrinology of social isolation                                                                                                        | Cacioppo              | 2015 |
| Toward a neurology of loneliness                                                                                                                  | Cacioppo              | 2014 |
| Social network ties and inflammation in U.S. Adults with cancer                                                                                   | Frenk et al           | 2014 |
| Social relationships and health: The toxic effects of perceived social isolation                                                                  | Cacioppo and Cacioppo | 2014 |
| An exploration of the value and mechanisms of befriending for older adults in England                                                             | Lester et al          | 2012 |
| Suicide and suicidal behavior                                                                                                                     | Nock et al            | 2008 |
| Vitamin D and the social aspects of disease                                                                                                       | Grimes et al          | 2011 |
| Social Isolation                                                                                                                                  | Cacioppo              | 2011 |
| Loneliness matters: A theoretical and empirical review of consequences and mechanisms                                                             | Hawkley and Cacioppo  | 2010 |
| Neural pathways link social support to attenuated neuroendocrine stress responses                                                                 | Lieberman et al       | 2007 |
| Peritoneal dialysis-related peritonitis: Can we predict it?                                                                                       | Chow and Li           | 2007 |
| Social integration is associated with fibrinogen concentration in elderly men                                                                     | Seeman et al          | 2005 |
| The anatomy of loneliness                                                                                                                         | Berntson et al        | 2003 |
| Loneliness and pathways to disease                                                                                                                | Hawkley and Cacioppo  | 2003 |
| Psychosocial influences on the development and course of coronary heart disease: Current status and implications for research and practice        | Smith and Ruiz        | 2002 |
| Social relationships and mortality in patients with congestive heart failure                                                                      | Murberg and Bru       | 2001 |
| Segregation and mortality: The deadly effects of racism?                                                                                          | Collins et al         | 1999 |
| The role of social relations in health promotion                                                                                                  | Berkman               | 1995 |
| Social relationships and health                                                                                                                   | House et al           | 1988 |
| Contribution of risk factors to excess mortality in isolated and lonely individuals: an analysis of data from the UK Biobank cohort study.        | Kivimaki et al        | 2017 |
| Exploring interactive surface designs for eliciting social activity from elderly adults                                                           | Binda et al           | 2016 |
| Myocardial infarction and coronary death among women: psychosocial predictors from a 20-year follow-up of women in the Framingham Study.          | Castelli et al        | 1992 |

|                                                                                                                                 |                          |      |
|---------------------------------------------------------------------------------------------------------------------------------|--------------------------|------|
| Disability, psychosocial factors and mortality among the elderly in a rural French population                                   | Albarede et al           | 1990 |
| Social ties and survival among the elderly in Tampere, Finland. International Journal of Epidemiology                           | Jylha and Aro            | 1989 |
| Relationship between respiratory mortality and self-perceptions of aging                                                        | Levy and Myers           | 2005 |
| Psychological predictors of mortality in old age                                                                                | Maier and Smith          | 1999 |
| Social networks and longevity. A 14 year follow-up study among elderly in Denmark.                                              | Waldstrom et al          | 1991 |
| Effects of social support and personal coping resources on mortality in older age: the Longitudinal Aging Study Amsterdam       | Van Eijk et al           | 1997 |
| Positive life orientation as a predictor of 10-year outcome in an aged population. Journal of clinical epidemiology             | Tilvis et al             | 2004 |
| Loneliness in older persons: a predictor of functional decline and death.                                                       | Covinsky et al           | 2012 |
| Loneliness, health, and longevity                                                                                               | Jacobs et al             | 2014 |
| Social isolation, social activity and loneliness as survival indicators in old age; a nationwide survey with a 7-year follow-up | Pitkala et al            | 2012 |
| Mortality and depressive symptoms in inhabitants of residential homes.                                                          | Cuijpers                 | 2001 |
| Psychosocial factors and breast cancer: a 6-year Italian follow-up study. Psychotherapy and psychosomatics                      | Grassi et al             | 1997 |
| Health and social networks as predictors of survival in old age.                                                                | Ljungquist and Sundstrom | 1996 |
| A longitudinal analysis of factors related to survival in old age                                                               | Wenger                   | 1992 |
| Social networks, social support, and mortality among older people in Japan                                                      | Liu et al                | 1994 |

Appendix 2: Thematic grouping of papers included in synthesis of literature examining associations between loneliness, social isolation, cardiovascular disease and mortality

| Theme                                                                                                            | Supporting papers                                                                                                                                                                                                                                                                                                                                                                                                                                                                                                                                                                                                                                                                                                                                                                                                                                                                                                                                                                                                                                                                                                                                                                                                                                                                                                                                                                                                                                                                                                                                                                                                                                                                                                                                                                                                                                                                                                                                                                                                                                                                                                                                                                                                                                                                                                                                                                                                                                                                                                                                                                                                                                                                                                                                                                                                                                                                                                                                                                                                                                                                                                                                                                                                                                                                                                                                                                                                                                                                                                                                                                                                                                                                                                                                                                                                                                                                                                                                                                                                                                                                                                                                                                                                                                                                                                  |
|------------------------------------------------------------------------------------------------------------------|--------------------------------------------------------------------------------------------------------------------------------------------------------------------------------------------------------------------------------------------------------------------------------------------------------------------------------------------------------------------------------------------------------------------------------------------------------------------------------------------------------------------------------------------------------------------------------------------------------------------------------------------------------------------------------------------------------------------------------------------------------------------------------------------------------------------------------------------------------------------------------------------------------------------------------------------------------------------------------------------------------------------------------------------------------------------------------------------------------------------------------------------------------------------------------------------------------------------------------------------------------------------------------------------------------------------------------------------------------------------------------------------------------------------------------------------------------------------------------------------------------------------------------------------------------------------------------------------------------------------------------------------------------------------------------------------------------------------------------------------------------------------------------------------------------------------------------------------------------------------------------------------------------------------------------------------------------------------------------------------------------------------------------------------------------------------------------------------------------------------------------------------------------------------------------------------------------------------------------------------------------------------------------------------------------------------------------------------------------------------------------------------------------------------------------------------------------------------------------------------------------------------------------------------------------------------------------------------------------------------------------------------------------------------------------------------------------------------------------------------------------------------------------------------------------------------------------------------------------------------------------------------------------------------------------------------------------------------------------------------------------------------------------------------------------------------------------------------------------------------------------------------------------------------------------------------------------------------------------------------------------------------------------------------------------------------------------------------------------------------------------------------------------------------------------------------------------------------------------------------------------------------------------------------------------------------------------------------------------------------------------------------------------------------------------------------------------------------------------------------------------------------------------------------------------------------------------------------------------------------------------------------------------------------------------------------------------------------------------------------------------------------------------------------------------------------------------------------------------------------------------------------------------------------------------------------------------------------------------------------------------------------------------------------------------------------|
| <p><b>Original research and reviews exploring the link between loneliness/social isolation and mortality</b></p> | <p>Loneliness and social isolation as risk factors for mortality: a meta-analytic review<br/> Social isolation, loneliness, and all-cause mortality in older men and women<br/> A Prospective Study of Social Isolation, Loneliness, and Mortality in Finland<br/> Loneliness, social isolation, their synergistic interaction, and mortality<br/> Reported loneliness rather than social isolation is a risk factor for 10-year mortality in older men<br/> Social isolation: a predictor of mortality comparable to traditional clinical risk factors<br/> Loneliness, health, and mortality in old age: a national longitudinal study<br/> Does the mortality risk of social isolation depend upon socioeconomic factors?<br/> Loneliness, health and mortality<br/> Loneliness, social networks, and mortality: 18 years of follow-up<br/> Situational versus chronic loneliness as risk factors for all-cause mortality.<br/> Among elderly men, feelings of loneliness are associated with increased 10-year mortality risk, independent of social isolation and medical and psychiatric conditions<br/> Older people who report loneliness have increased risk of mortality and functional decline<br/> Effect of loneliness on mortality after retirement.<br/> Increased risk of mortality associated with social isolation in older men: only when feeling lonely?<br/> Results from the Amsterdam Study of the Elderly (AMSTEL)<br/> Suffering from loneliness indicates significant mortality risk of older people<br/> Social isolation and loneliness as risk factors for myocardial infarction, stroke and mortality: UK Biobank cohort study of 479 054 men and women<br/> Emotional loneliness is associated with mortality among mentally intact nursing home residents with and without cancer: a five-year follow-up study.<br/> Feelings of Loneliness and Living Alone as Predictors of Mortality in the Elderly: The PAQUID Study.<br/> Impact of loneliness and depression on mortality: results from the Longitudinal Ageing Study Amsterdam<br/> Relationship of depression, anxiety, and social isolation to chronic heart failure outpatient mortality<br/> Extreme social isolation, use of community-based senior support services, and mortality among African American elderly women.<br/> Loneliness and All-Cause, Cardiovascular, and Noncardiovascular Mortality in Older Men: The Zutphen Elderly Study<br/> The feeling of loneliness prior to coronary artery bypass grafting might be a predictor of short- and long-term postoperative mortality<br/> Combined effects of job strain and social isolation on cardiovascular disease morbidity and mortality in a random sample of the Swedish male working population<br/> Social isolation and mortality in ischemic heart disease. A 10-year follow-up study of 150 middle-aged men<br/> All-cause mortality and multimorbidity in older adults: The role of social support and loneliness<br/> Social isolation, health literacy, and mortality risk: Findings from the English Longitudinal Study of Ageing<br/> Social isolation and all-cause mortality: a population-based cohort study in Denmark<br/> Heartbeat: Social isolation is associated with increased mortality after acute myocardial infarction or stroke<br/> Association of loneliness with all-cause mortality: A meta-analysis.<br/> The Pathophysiology of Perceived Social Isolation: Effects on Health and Mortality.<br/> Co-existence of social isolation and homebound status increase the risk of all-cause mortality<br/> Social Isolation and Mortality in US Black and White Men and Women.<br/> Loneliness, social isolation and risk of cardiovascular disease in the English Longitudinal Study of Ageing<br/> <a href="#">Loneliness and all-cause mortality in community-dwelling elderly Singaporeans</a><br/> <a href="#">Social isolation, cognitive decline, and cardiovascular disease risk</a><br/> <a href="#">Depression, isolation, social support, and cardiovascular disease in older adults</a><br/> Does social isolation predict hospitalization and mortality among HIV+ and uninfected older veterans?<br/> Type A behaviour, social support, and coronary risk: interaction and significance for mortality in</p> |

cardiac patients  
Older Adults' Social Relationships and Health Care Utilization: A Systematic Review  
Whites but Not Blacks Gain Life Expectancy from Social Contacts  
An overview of systematic reviews on the public health consequences of social isolation and loneliness  
Gender-specific secondary prevention? Differential psychosocial risk factors for major cardiovascular events  
Role of social factors on cell death, cerebral plasticity and recovery after stroke  
Social networks, social support, and burden in relationships, and mortality after breast cancer diagnosis in the Life After Breast Cancer Epidemiology (LACE) study  
Socioeconomic status, structural and functional measures of social support, and mortality: The British Whitehall II Cohort Study, 1985-2009  
Positive life orientation predicts good survival prognosis in old age  
Long-term effect of social relationships on mortality in patients with congestive heart failure  
Predictors of cognitive decline and mortality of aged people over a 10-year period  
Towards a suicide free society: identify suicide prevention as public health policy  
Longitudinal study of psychiatric symptoms, disability, mortality, and emigration among Bosnian refugees  
Characteristics of socially isolated patients with coronary artery disease who are at elevated risk for mortality  
Self-reported life satisfaction and 20-year mortality in healthy Finnish adults  
Why do men get more heart disease than women? An international perspective  
Depressive symptoms and lack of social integration in relation to prognosis of CHD in middle-aged women. The Stockholm Female Coronary Risk Study  
[Social Networks and Health Outcomes: Importance for Racial and Socioeconomic Disparities in Cardiovascular Outcomes](#)  
[A conceptual model of social networks and mechanisms of cancer mortality, and potential strategies to improve survival](#)  
[The role of social relationships in the link between olfactory dysfunction and mortality](#)  
[Loneliness, Social Isolation, and Cardiovascular Health](#)  
[Loneliness and Health in Older Adults: A Mini-Review and Synthesis](#)  
Breast cancer and social environment: getting by with a little help from our friends.  
Personal Networks and Mortality Risk in Older Adults: A Twenty-Year Longitudinal Study  
[Social relationships and health: The toxic effects of perceived social isolation](#)  
[Vitamin D and the social aspects of disease](#)  
Social Isolation  
Loneliness and pathways to disease  
[Social relationships and mortality in patients with congestive heart failure](#)  
[Segregation and mortality: The deadly effects of racism?](#)  
[Social relationships and health](#)  
Myocardial infarction and coronary death among women: psychosocial predictors from a 20-year follow-up of women in the Framingham Study.  
Disability, psychosocial factors and mortality among the elderly in a rural French population  
Social ties and survival among the elderly in Tampere, Finland. International Journal of Epidemiology  
Relationship between respiratory mortality and self-perceptions of aging  
Psychological predictors of mortality in old age  
Social networks and longevity. A 14 year follow-up study among elderly in Denmark.  
Effects of social support and personal coping resources on mortality in older age: the Longitudinal Aging Study Amsterdam  
Positive life orientation as a predictor of 10-year outcome in an aged population.  
Loneliness in older persons: a predictor of functional decline and death.  
Loneliness, health, and longevity  
Social isolation, social activity and loneliness as survival indicators in old age; a nationwide survey with a 7-year follow-up  
Mortality and depressive symptoms in inhabitants of residential homes.  
Psychosocial factors and breast cancer: a 6-year Italian follow-up study. Psychotherapy and psychosomatics  
Health and social networks as predictors of survival in old age.  
A longitudinal analysis of factors related to survival in old age

|                                                                                                 |                                                                                                                                                                                                                                                                                                                                                                                                                                                                                                                                                                                                                                                                                                                                                                                                                                                                                                                                                                                                                                                                                                                                                                                                                                                                                                                                                                                                                                                                                                                                                                                                                                                                                                                                                                                                                                                                                                                                                                                                   |
|-------------------------------------------------------------------------------------------------|---------------------------------------------------------------------------------------------------------------------------------------------------------------------------------------------------------------------------------------------------------------------------------------------------------------------------------------------------------------------------------------------------------------------------------------------------------------------------------------------------------------------------------------------------------------------------------------------------------------------------------------------------------------------------------------------------------------------------------------------------------------------------------------------------------------------------------------------------------------------------------------------------------------------------------------------------------------------------------------------------------------------------------------------------------------------------------------------------------------------------------------------------------------------------------------------------------------------------------------------------------------------------------------------------------------------------------------------------------------------------------------------------------------------------------------------------------------------------------------------------------------------------------------------------------------------------------------------------------------------------------------------------------------------------------------------------------------------------------------------------------------------------------------------------------------------------------------------------------------------------------------------------------------------------------------------------------------------------------------------------|
|                                                                                                 | Social networks, social support, and mortality among older people in Japan                                                                                                                                                                                                                                                                                                                                                                                                                                                                                                                                                                                                                                                                                                                                                                                                                                                                                                                                                                                                                                                                                                                                                                                                                                                                                                                                                                                                                                                                                                                                                                                                                                                                                                                                                                                                                                                                                                                        |
| <b>Research exploring biological links between loneliness/social isolation and mortality</b>    | <p>Social isolation and adult mortality: the role of chronic inflammation and sex differences</p> <p>Social isolation, C-reactive protein, and coronary heart disease mortality among community-dwelling adults</p> <p>Social isolation and cardiovascular disease: an atherosclerotic pathway?</p> <p>Loneliness in older adults is associated with diminished cortisol output</p> <p>Sleep disturbance and longitudinal risk of inflammation: Moderating influences of social integration and social isolation in the Coronary Artery Risk Development in Young Adults (CARDIA) study</p> <p>Social isolation and health, with an emphasis on underlying mechanisms</p> <p>Frequency of Leaving the House and Mortality from Age 70 to 95</p> <p>Prevalence of orthostatic hypertension in the very elderly and its relationship to all-cause mortality</p> <p>One is the deadliest number: the detrimental effects of social isolation on cerebrovascular diseases and cognition.</p> <p><a href="#">The neuroendocrinology of social isolation</a></p> <p><a href="#">Toward a neurology of loneliness</a></p> <p><a href="#">Social network ties and inflammation in U.S. Adults with cancer</a></p> <p><a href="#">Loneliness matters: A theoretical and empirical review of consequences and mechanisms</a></p> <p><a href="#">Neural pathways link social support to attenuated neuroendocrine stress responses</a></p> <p><a href="#">Peritoneal dialysis-related peritonitis: Can we predict it?</a></p> <p><a href="#">Social integration is associated with fibrinogen concentration in elderly men</a></p>                                                                                                                                                                                                                                                                                                                                                                           |
| <b>Research exploring behavioural links between loneliness/social isolation and mortality</b>   | <p>Loneliness and mortality among older adults in China</p> <p>Loneliness and risk of mortality: a longitudinal investigation in Alameda County, California</p> <p>Consequences of loneliness on physical activity and mortality in older adults and the power of positive emotions</p> <p>The Pathophysiology of Perceived Social Isolation: Effects on Health and Mortality.</p> <p>Sleep disturbance and longitudinal risk of inflammation: Moderating influences of social integration and social isolation in the Coronary Artery Risk Development in Young Adults (CARDIA) study</p> <p>Social isolation and health, with an emphasis on underlying mechanisms</p> <p>Does current smoking predict future frailty? The English longitudinal study of ageing</p> <p>The association between social support and physical activity in older adults: a systematic review</p> <p>Gender differences in the roles for social support in ensuring adequate fruit and vegetable consumption among older adult Canadians</p> <p>Unobtrusive in-home detection of time spent out-of-home with applications to loneliness and physical activity</p> <p>Nutritional risk and body mass index predict hospitalization, nursing home admissions, and mortality in community-dwelling older adults: results from the UAB Study of Aging with 8.5 years of follow-up</p> <p>Using multi-level data to estimate the effect of social capital on hazardous alcohol consumption in the former Soviet Union</p> <p>Living alone and alcohol-related mortality: a population-based cohort study from Finland</p> <p>Eating habits and appetite control in the elderly: the anorexia of aging.</p> <p>Effects of depression and social integration on the relationship between alcohol consumption and all-cause mortality</p> <p>The anatomy of loneliness</p> <p>Contribution of risk factors to excess mortality in isolated and lonely individuals: an analysis of data from the UK Biobank cohort study.</p> |
| <b>Research exploring psychological links between loneliness/social isolation and mortality</b> | <p>Loneliness and risk of mortality: a longitudinal investigation in Alameda County, California</p> <p>The Pathophysiology of Perceived Social Isolation: Effects on Health and Mortality.</p> <p>Loneliness and cardiovascular disease and the role of late-life depression</p> <p>Longitudinal study of suicide after traumatic injury</p> <p>Is depression in old age fatal only when people feel lonely?</p> <p><a href="#">Suicide and suicidal behavior</a></p> <p><a href="#">Psychosocial influences on the development and course of coronary heart disease: Current status and implications for research and practice</a></p>                                                                                                                                                                                                                                                                                                                                                                                                                                                                                                                                                                                                                                                                                                                                                                                                                                                                                                                                                                                                                                                                                                                                                                                                                                                                                                                                                           |
| <b>Papers exploring potential interventions</b>                                                 | Effects of psychosocial group rehabilitation on health, use of health care services, and mortality of older persons suffering from loneliness: a randomized, controlled trial                                                                                                                                                                                                                                                                                                                                                                                                                                                                                                                                                                                                                                                                                                                                                                                                                                                                                                                                                                                                                                                                                                                                                                                                                                                                                                                                                                                                                                                                                                                                                                                                                                                                                                                                                                                                                     |

**to decrease loneliness  
and social isolation**

The personal and community impact of a Scottish Men's Shed  
Psychosocial interventions for patients with coronary heart disease and depression: A systematic review and meta-analysis  
Pet ownership protects against the risks and consequences of coronary heart disease  
[An exploration of the value and mechanisms of befriending for older adults in England](#)  
[The role of social relations in health promotion](#)  
[Exploring interactive surface designs for eliciting social activity from elderly adults](#)
